# Supplementary material for: Vertically aligned graphitic carbon nanosheet arrays fabricated from graphene oxides for supercapacitors and Li–O2 batteries
Source: Royal Society of Chemistry journal article supplement (doi:10.1039/c6cc01418f), 2016-01-01
Supplement: c6cc01418f1.pdf [file c6cc01418f1.pdf]

1 **Supporting information**

2 Vertically aligned graphitic carbon nanosheet arrays fabricated from graphene oxides  
3 for supercapacitors and Li–O<sub>2</sub> batteries

4 Guangyu Zhao, Li Zhang, Jixian Lv, Changle Li, Kening Sun\*

5 Academy of Fundamental and Interdisciplinary Sciences, Harbin Institute of  
6 Technology, Harbin, China. E-mail: keningsunhit@126.com (K. Sun).

7

8 **Experimental section**

9 *Preparation of VAGN films*

10 All the reagents in the experiments were analytical pure. Graphite oxide was  
11 prepared by oxidizing graphite using the improved Hummers method. The graphite  
12 oxide product was suspended in distilled water to give a viscous, brown, 4 mg mL<sup>-1</sup>  
13 dispersion, which was subjected to dialysis to completely remove metal ions and acids.  
14 Graphene oxides (GOs) were prepared by treating the as-prepared graphite oxide with  
15 ultrasonic in diluted solution. The ammonium peroxy-polymolybdate solution was  
16 prepared by dissolving 3.0 g Mo powder (2 μm, Aladdin Chemistry) in 100 mL H<sub>2</sub>O<sub>2</sub>  
17 at 60 °C following the reactions:

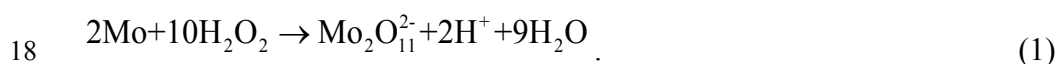

19 When the metal powder was completely dissolved and the exothermic reaction had  
20 ended, a Pt foil was added to reduce the excess peroxide. Then the solution was  
21 neutralized to be neutral with ammonia. In a typical hydrothermal procedure, 1.0 mL  
22 GO suspension was mixed with 0.065 mL (NH<sub>4</sub>)<sub>2</sub>Mo<sub>2</sub>O<sub>11</sub> aqueous solution (30.0 mg

23 mL<sup>-1</sup>) (the mass ratio of (NH<sub>4</sub>)<sub>2</sub>Mo<sub>2</sub>O<sub>11</sub> to GO was 1:2), and the mixture was diluted  
24 to 80 mL with deionized water. Then the mixture was treated by ultrasound 0.5 h to  
25 disperse the GOs. Other mass ratios were achieved by adjusted the amount of  
26 (NH<sub>4</sub>)<sub>2</sub>Mo<sub>2</sub>O<sub>11</sub>. Then a circular Ni foam plate (diameter = 15 mm) was dipped in the  
27 mixture. The mixture was sealed in a Teflon-lined stainless steel autoclave and  
28 maintained at 180 °C for 16 h; the as-obtained Ni foams were naturally cooled to  
29 room temperature followed by freeze-drying. The dry samples were heat-treated at  
30 350 °C for 3 h in Ar atmosphere to lead a crystallization of molybdenum dioxide. The  
31 weights of as-prepared VAGN films were measured by means of a micro-balance  
32 (Mettler Toledo, USA) with an accuracy of 0.01 mg. The weight of the films was  
33 around several mg.

#### 34 *Supercapacitor and Li–O<sub>2</sub> battery tests*

35 For supercapacitive measurement, a three electrode cell was used for all  
36 electrochemical measurements. A VAGN film electrode was vertically inserted into  
37 the electrolyte and acted as the working electrode, a Pt plane acted as the counter  
38 electrode, and a SCE acted as the reference electrode. Cyclic voltammogram (CV)  
39 and electrochemical impedance spectra (EIS) measurements were performed using a  
40 CHI 660D with Na<sub>2</sub>SO<sub>4</sub> solution (1.0 M) as the electrolyte. The Li–O<sub>2</sub> batteries were  
41 measured in Swagelok type models assembled inside an MBraun glove box. The cells  
42 were constructed by placing a 15 mm diameter Li disk on the bottom, covering it with  
43 a piece of glass fiber separator (20 mm diameter, Whatman), adding excessive  
44 electrolyte (1.0 M LiTFSI in tetraethylene glycol dimethyl ether (TEGDME)), placing

45 an VAGN coated Ni foam on the separator, and sealing the Swagelok cell. All the  
46 electrochemical measurements to the batteries were carried out in pure O<sub>2</sub> at 1 atm  
47 (99.99%). A BTS-2000 Neware Battery Testing System was employed for  
48 charge/discharge tests. CV measurements were also performed using the CHI 660D.

#### 49 *Instruments for Characterization*

50 Scanning electron microscope (SEM) images were obtained on a Hitachi Su-8100.  
51 The X-ray diffraction (XRD) patterns were obtained on a PANalytical X'pert PRO X-  
52 ray diffractometer with Cu K $\alpha$  radiation ( $\lambda = 1.5418 \text{ \AA}$ ). High resolution transmission  
53 electron microscope (HRTEM) images, selected area electron diffraction (SAED) and  
54 energy dispersive X-ray spectrum (EDS) patterns were obtained on a FEI Tecnai G<sup>2</sup>.  
55 X-ray photoelectron spectra (XPS) were obtained with a K-Alpha electron  
56 spectrometer (Thermofish Scientific Company) using Al K $\alpha$  (1486.6 eV) radiation.  
57 The base pressure was about  $1 \times 10^{-8}$  mbar. The binding energies were referenced to  
58 the C1s line at 284.8 eV from adventitious carbon.

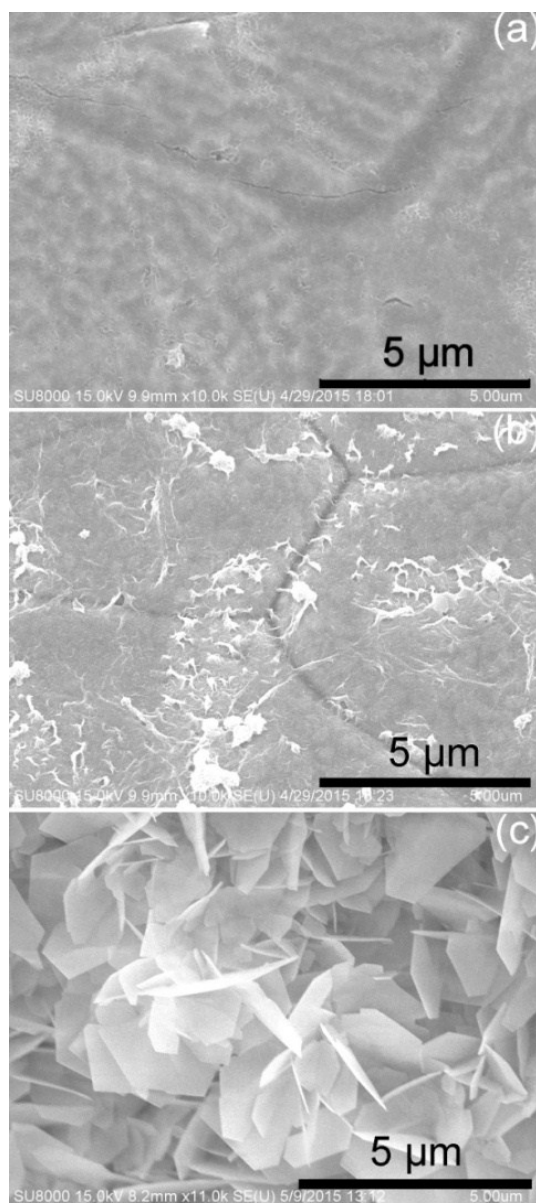

59

60 Fig. S1. SEM images of Ni surface after hydrothermal treatment in GOs with different  
61 salts: (a)  $\text{NiCl}_2$ , (b)  $\text{Co}(\text{NO}_3)_2$ , (c)  $\text{Fe}(\text{NO}_3)_3$ . Rates of charge for the three experiments  
62 all are salt: GO = 1:1 in weight.

63 Explanation: No VAGN can be detected on Ni foams treated in the three solutions.

64 GOs lying on Ni surface in Fig. S1b have a size consistent with pristine GOs, and the  
65 hexagonal flakes in Fig. S1c are not graphitic sheets. These all indicate the three salts

66 have not interaction with GOs.

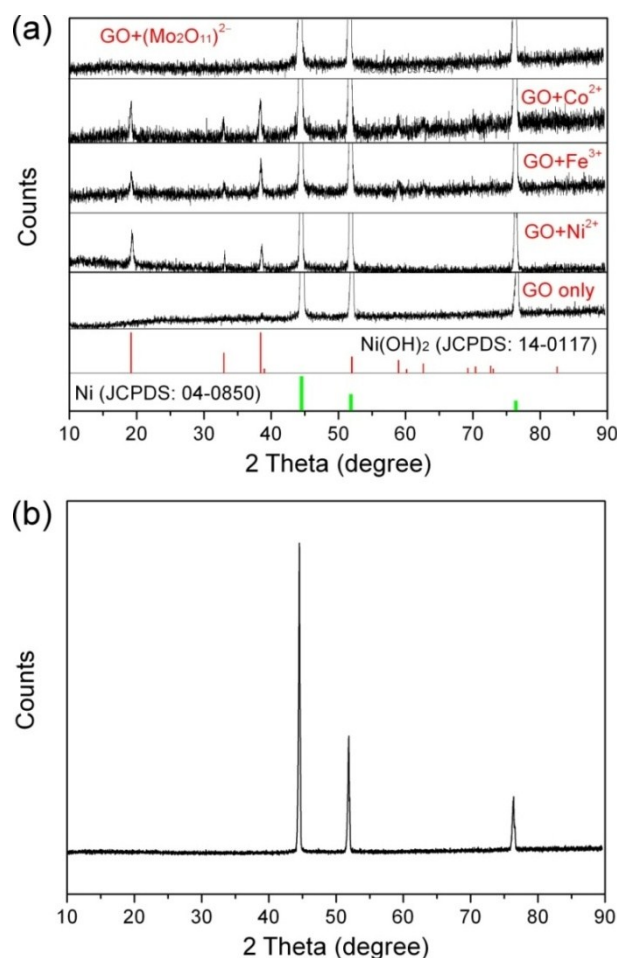

67

68 Fig. S2. XRD patterns of Ni foams treated with different solutions in hydrothermal  
 69 synthesis: (a) in GOs, GOs+ NiCl<sub>2</sub>, GOs+ Fe(NO<sub>3</sub>)<sub>3</sub>, GOs+Co(NO<sub>3</sub>)<sub>2</sub> and  
 70 GOs+(NH<sub>4</sub>)<sub>2</sub>Mo<sub>2</sub>O<sub>11</sub>; (b) in (NH<sub>4</sub>)<sub>2</sub>Mo<sub>2</sub>O<sub>11</sub> solution without GOs.

71 Explanation: The Ni foams from hydrothermal reactions with GO-containing  
 72 solutions of Ni<sup>2+</sup>, Fe<sup>3+</sup> or Co<sup>2+</sup> all present Ni(OH)<sub>2</sub> patterns (JCPDS: 14-0117). The  
 73 XRD pattern of Ni foam from “GO only” solution has no obvious variation compared  
 74 with raw Ni foam, demonstrating no interaction of GOs with Ni foam. However, Ni  
 75 foam covered with VAGNs from the Mo<sub>2</sub>O<sub>11</sub><sup>2-</sup>-containing GO solution also exhibits  
 76 no variation. Otherwise, XRD result of Ni foam treated in the (NH<sub>4</sub>)<sub>2</sub>Mo<sub>2</sub>O<sub>11</sub> solution  
 77 only (no GOs) also exhibits the pattern of Ni metal (JCPDS: 04-0805), as shown in  
 78 Fig. S2b. The XRD results reveal Mo<sub>2</sub>O<sub>11</sub><sup>2-</sup> can react with GOs but not with Ni foam.

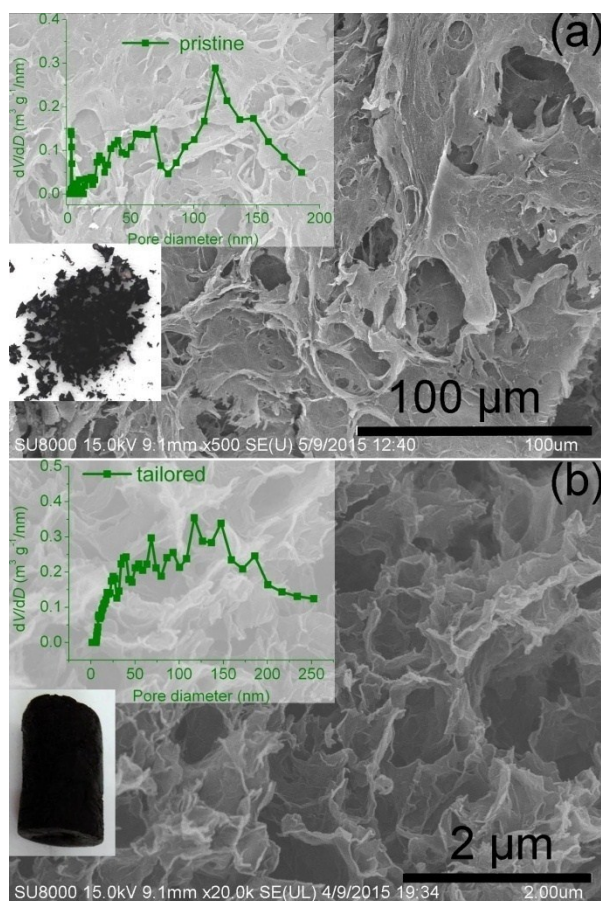

79

80 Fig. S3. SEM images of the products (no Ni foam) from hydrothermal in GOs only  
 81 and GOs+(NH<sub>4</sub>)<sub>2</sub>Mo<sub>2</sub>O<sub>11</sub> (rate of charge is 1:1). Upper left insets are corresponding  
 82 pore size distribution curves and left down insets are corresponding digital  
 83 photographs of the products.

84 Explanation: The graphitic sheets align to form porous cylinder foam from the  
 85 solution of GOs+(NH<sub>4</sub>)<sub>2</sub>Mo<sub>2</sub>O<sub>11</sub>, compared with the powder obtained from GOs only,  
 86 as shown in the digital photographs in left bottom of Fig. S3a and b. Apparently,  
 87 Mo<sub>2</sub>O<sub>11</sub><sup>2-</sup> anions can tailor graphitic sheets to be much smaller (Fig. S3b) resulting in  
 88 smaller pore size of the foam, which can be verified by the pore size distribution  
 89 curves in upper left of Fig. S3a and b.

90

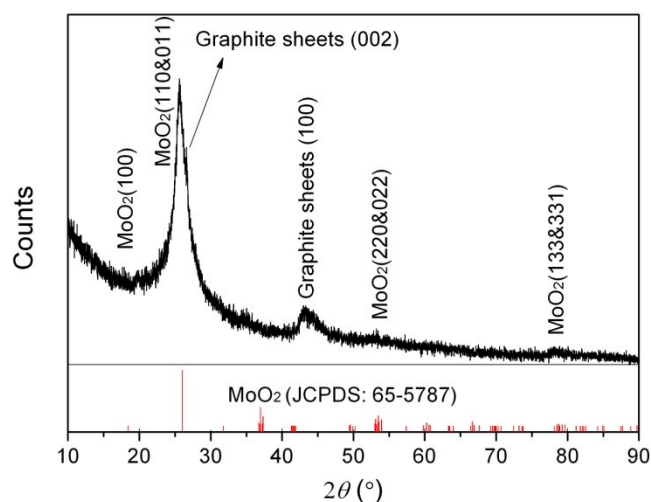

91

92 Fig. S4. XRD pattern of the powder scraped from VAGN films.

93 Explanation: The graphite (002) demonstrates GOs stacking in VAGN films, and the

94 other peaks can be ascribed to MoO<sub>2</sub> (JCPDS: 65-5787).

95

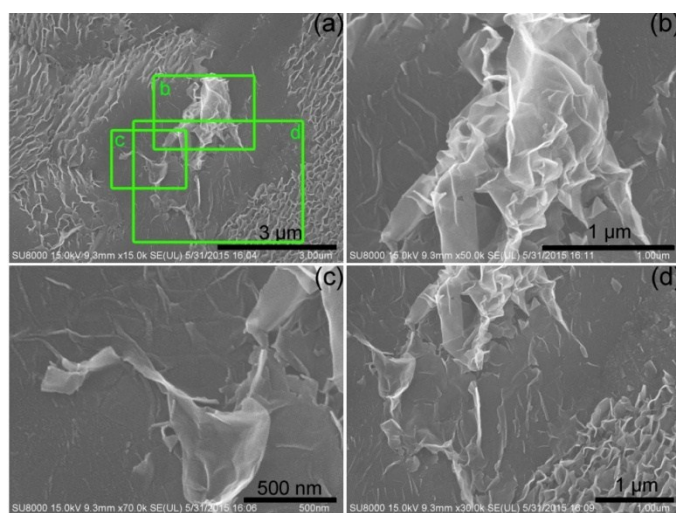

96

97 Fig. S5. SEM images of a special case that GO aggregate and VAGNs coexisting (1:2

98 rate): (a) overview; (b, c, d) images corresponding to the square s in green squares in

99 (a).

100 Explanation: Fig. S5a is an overview, and b, c, and d are parts of a. The raw GO in

101 Fig. S5b lying on the Ni surface results in an area without “planted” VAGNs. On the

102 other hand, some GO pieces are tailored from edges of the large pieces, and some of

103 them are stood on the Ni surface, as shown in Fig. S5c and d. Fig.S5 reveals that the  
104 tailoring of GO to smaller sized pieces is crucial for planting them onto the Ni  
105 substrates.

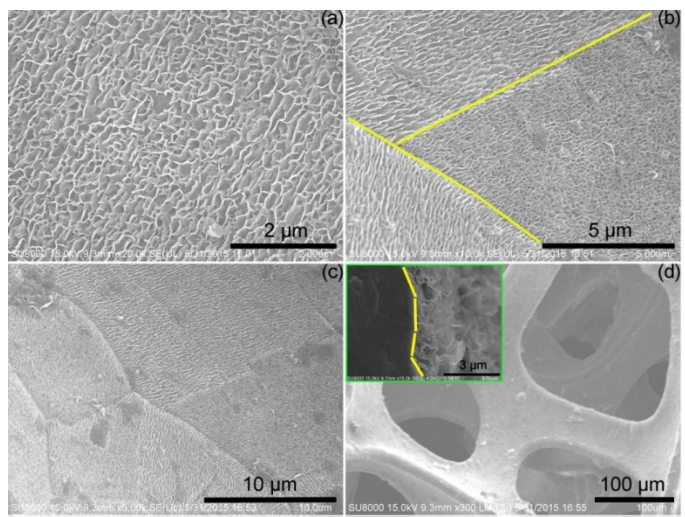

106

107 Fig. S6. SEM images in different magnifications of VAGN films (1:2 rate), the inset  
108 in (d) is profile view of the VAGN film.

109 Explanation: The typical surface morphology of the samples formed with a 1 : 2 ratio  
110 is presented in Fig. S6. Apparently, the nanosheets distribute on the Ni foam surface  
111 homogeneously, and rare GO aggregates disturb the good continuity. Notably, the  
112 VAGNs on different Ni grains have different orientations, causing visible boundaries  
113 between different areas, as shown in Fig. S6b and c. We suggest the interaction of  
114 MoO<sub>2</sub> and Ni, depending on the crystal orientation of surface Ni atoms, is responsible  
115 for the different orientations of the nanosheets. Fig. S6d shows the low magnification  
116 front view and profile view (inset) of the VAGN film (1 : 2 ratio). Obviously, the film  
117 is a single layer of nanosheets freestanding on the Ni surface.



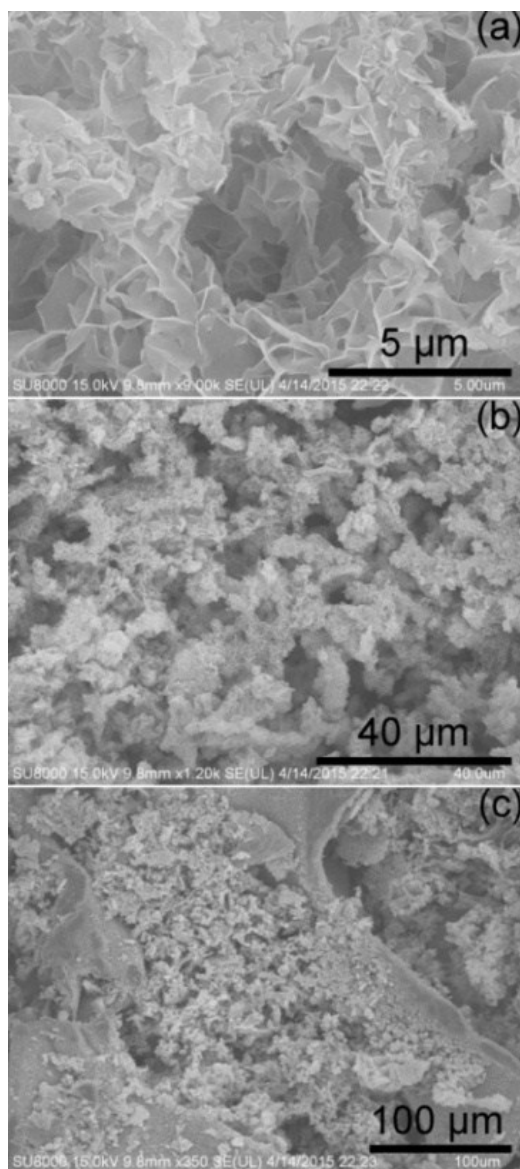

118

119 Fig. S7. SEM images in different magnifications of the products obtained from the  
120 rate of charge at 5:1.

121 Explanation: As the addition ratio rises to 5 : 1 (Fig. S7), a graphitic foam fills in the  
122 pores of the Ni foam owing to the continuous connection of GO fragments.

123 Furthermore, the sizes of the graphitic sheets and pores in the foam obtained from a 5 :  
124 1 ratio are all larger than the VAGN film obtained from the 1 : 2 ratio.

125

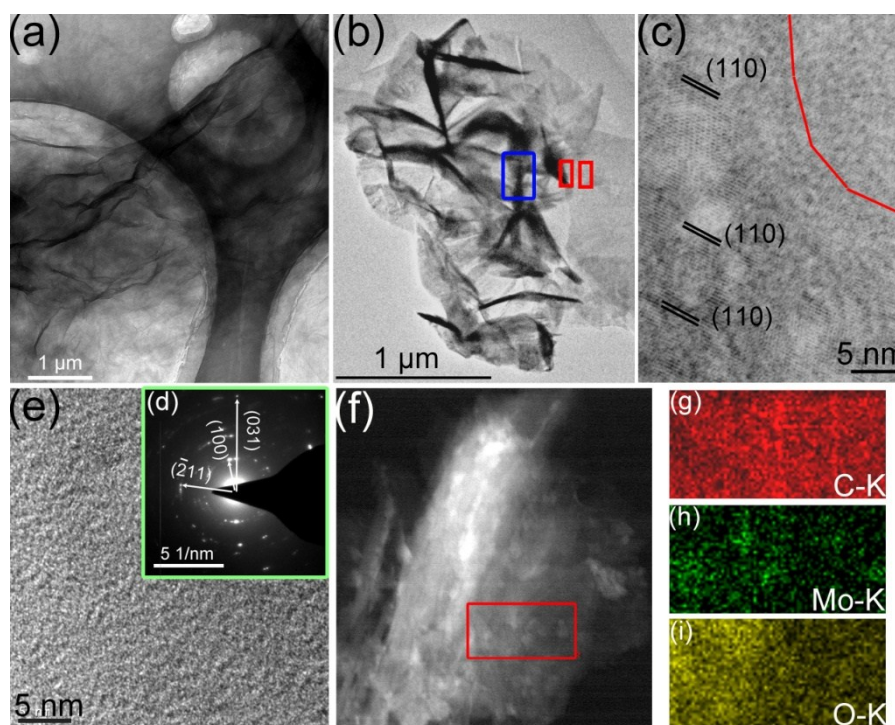

126

127 Fig. S8. TEM results of GOs and graphitic sheets scraped from Ni foams those treated  
 128 by hydrothermal in 1:2 rate: (a) TEM image of pristine GOs; (b) TEM image of  
 129 graphitic sheets scraped from Ni substrates; (c, e) High resolution TEM images of the  
 130 area from the red square in c; (d) SAED pattern of the nanosheet; (f) STEM image of  
 131 the dark area in a typical graphitic sheet from blue square in (b); (g, h, i) C, Mo, O  
 132 EDS mapping of the selected area in the red box in (f).

133 Explanation: The tailoring process carries out at the defects of GOs, resulting in the  
 134  $\text{MoO}_2$  generating on the edges of graphitic fragments, as shown in Fig. 2. The random  
 135 motion of the fragments in hydrothermal synthesis leads the  $\text{MoO}_2$  anchoring on Ni  
 136 surface, resulting in the VAGN film forming in a self-assembly manner. The  
 137 distribution of the three elements demonstrates that the  $\text{MoO}_2$  act as “soil” when the  
 138 “graphitic sheets plant” is anchored on the substrate.

139

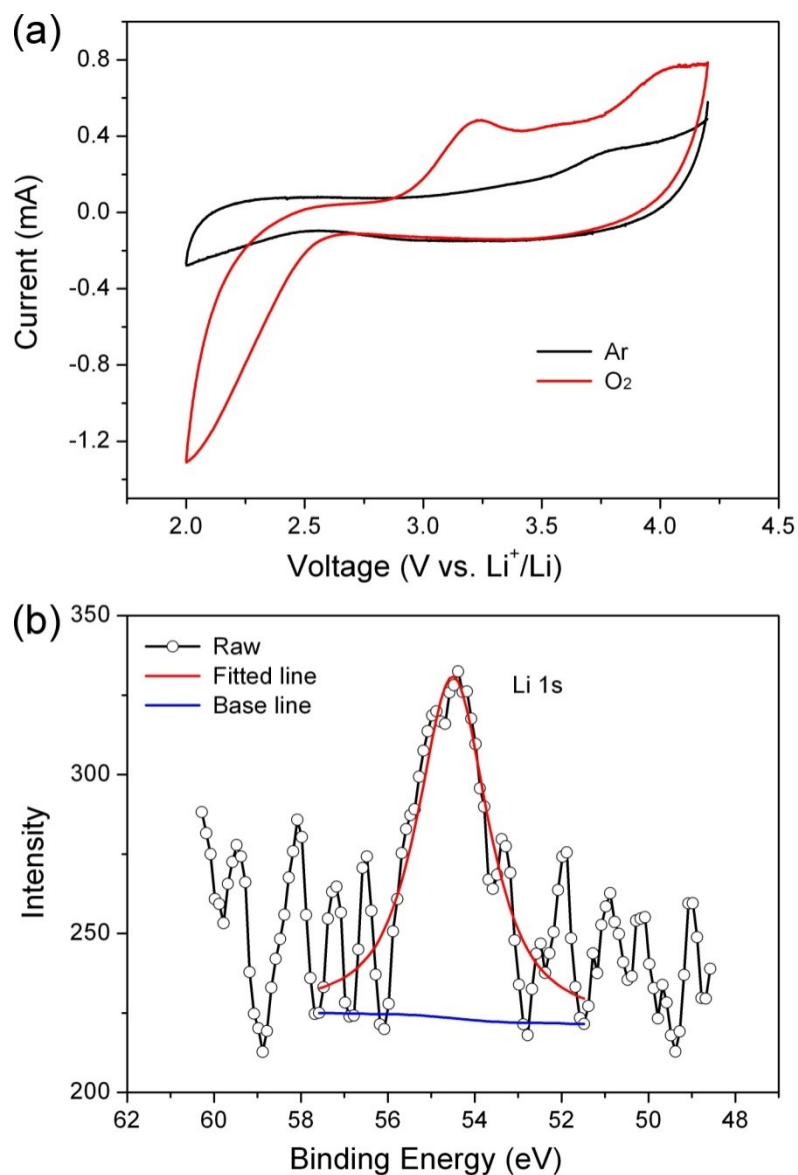

140

141 Fig. S9. (a) CV curves of the battery filled with Ar and O<sub>2</sub>. (b) Li1s of the VAGN  
 142 films after discharge in Li–O<sub>2</sub> battery.

143 Explanation: Fig. S9a shows the cyclic voltammograms (CV) of graphitic foam as  
 144 cathode in a typical Li–O<sub>2</sub> battery. A clear distinction between ORR/OER and the  
 145 argon background (black curve) is observed. Otherwise, XPS of Li1s from VAGN  
 146 film after the 1st discharge in Fig. S9b reveals the generation of Li<sub>2</sub>O<sub>2</sub> (54.3 eV),  
 147 based on the previous result on the discharged sample using the same electrolyte.
